# Supplementary material for: Kidney Function Change and All-Cause Mortality in Denosumab Users with and without Chronic Kidney Disease
Source: MDPI journal article supplement (doi:10.3390/jpm12020185), 2022-01-31

**Table S1.** Deyo's Charlson comorbidity index (ICD-9CM and ICD-10-CM)

| Comorbid conditions                   | ICD-9-CM                                        | ICD-10-CM                                                                                                                                                                                 |
|---------------------------------------|-------------------------------------------------|-------------------------------------------------------------------------------------------------------------------------------------------------------------------------------------------|
| Myocardial infarction                 | 410.x, 412.x                                    | I21.x, I22.x, I25.2                                                                                                                                                                       |
| Congestive heart failure              | 428.x                                           | I09.9, I11.0, I13.0, I13.2, I25.5, I42.0, I42.5–<br>I42.9, I43.x, I50.x, P29.0                                                                                                            |
| Peripheral vascular disease           | 443.9, 441.x, 785.4, V43.4                      | I70.x, I71.x, I73.1, I73.8, I73.9, I77.1, I79.0,<br>I79.2, K55.1, K55.8, K55.9, Z95.8, Z95.9                                                                                              |
| Cerebrovascular disease               | 430.x-438.x                                     | G45.x, G46.x, H34.0, I60.x–I69.x                                                                                                                                                          |
| Dementia                              | 290.x                                           | F00.x–F03.x, F05.1, G30.x, G31.1                                                                                                                                                          |
| Chronic pulmonary disease             | 490.x-505.x, 506.4                              | I27.8, I27.9, J40.x–J47.x, J60.x–J67.x, J68.4,<br>J70.1, J70.3                                                                                                                            |
| Rheumatic disease                     | 710.0, 710.1, 710.4, 714.0-714.2, 714.81, 725.x | M05.x, M06.x, M31.5, M32.x–M34.x, M35.1,<br>M35.3, M36.0                                                                                                                                  |
| Peptic ulcer disease                  | 531.x-534.x                                     | K25.x–K28.x                                                                                                                                                                               |
| Mild liver disease                    | 571.2, 571.4-571.6                              | B18.x, K70.0–K70.3, K70.9, K71.3–K71.5,<br>K71.7, K73.x, K74.x, K76.0, K76.2–K76.4,<br>K76.8, K76.9, Z94.4                                                                                |
| Diabetes without chronic complication | 250.0–250.3, 250.7                              | E10.0, E10.1, E10.6, E10.8, E10.9, E11.0,<br>E11.1, E11.6, E11.8, E11.9, E12.0, E12.1,<br>E12.6, E12.8, E12.9, E13.0, E13.1, E13.6,<br>E13.8, E13.9, E14.0, E14.1, E14.6, E14.8,<br>E14.9 |

---

|                                                                                          |                                           |                                                                                                                |
|------------------------------------------------------------------------------------------|-------------------------------------------|----------------------------------------------------------------------------------------------------------------|
| Diabetes with complication                                                               | 250.4–250.6                               | E10.2–E10.5, E10.7, E11.2–E11.5, E11.7,<br>E12.2–E12.5, E12.7, E13.2–E13.5, E13.7,<br>E14.2–E14.5, E14.7       |
| Hemiplegia or paraplegia                                                                 | 344.1, 342.x                              | G04.1, G11.4, G80.1, G80.2, G81.x, G82.x,<br>G83.0–G83.4, G83.9                                                |
| Renal disease                                                                            | 582.x , 583-583.7 , 585.x , 586.x , 588.x | I12.0, I13.1, N03.2–N03.7, N05.2–N05.7,<br>N18.x, N19.x, N25.0, Z49.0–Z49.2, Z94.0,<br>Z99.2                   |
| Any malignancy, including<br>lymphoma and leukemia, except<br>malignant neoplasm of skin | 140.x-172.x, 174.x-195.8, 200.x-208.x     | C00.x–C26.x, C30.x–C34.x, C37.x–C41.x,<br>C43.x, C45.x–C58.x, C60.x–C76.x, C81.x–<br>C85.x, C88.x, C90.x–C97.x |
| Moderate or severe liver disease                                                         | 456.0-456.21, 572.2-572.8                 | I85.0, I85.9, I86.4, I98.2, K70.4, K71.1, K72.1,<br>K72.9, K76.5, K76.6, K76.7                                 |
| Metastatic solid tumor                                                                   | 196.x-199.1                               | C77.x–C80.x                                                                                                    |
| AIDS/HIV                                                                                 | 042.x-044.x                               | B20.x–B22.x, B24.x                                                                                             |

---

**Table S2.** Definition of a specific disease in this study

| Definition          | ICD-9-CM                                                                                                                                                                                                                        | ICD-10-CM                                                                                                                                                                                       |
|---------------------|---------------------------------------------------------------------------------------------------------------------------------------------------------------------------------------------------------------------------------|-------------------------------------------------------------------------------------------------------------------------------------------------------------------------------------------------|
| All fractures       | 800-829                                                                                                                                                                                                                         | S02,S12,S22,S32,S42,S49,S52,S59,<br>S62,S69,S72,S79,S82,S89,S92,S99                                                                                                                             |
| Hip fracture        | 820.x                                                                                                                                                                                                                           | S72, S79                                                                                                                                                                                        |
| Hip surgery         | 84.17, 79.25, 79.35, 79.05, 79.15,<br>79.09, 79.19, 03.53, 80.15, 80.75,<br>80.95, 79.85, 79.75, 83.14, 83.19,<br>84.19, 79.39, 79.29, 81.51, 81.52,<br>81.54, 81.81, 81.40, 81.21, 81.53,<br>77.85, 80.05, 79.29, 79.39, 77.15 | Operation procedure code<br>0SJ, 0MC, 0S9, 0SC, 0Y6, 0QS,<br>0PS, 0M9, 0SB, 0MB, 0MT, 0ST,<br>0SS, 0J8, 0JD, 0Q9, 0SR, 0RR,<br>0SQ, 0SG, 0SW, 0QB, 0QT, 0SP                                     |
| Hemodialysis        | 585 plus hemodialysis treatment<br>procedure code (58001C, 58019C,<br>58020C, 58021C, 58022C, 58023C,<br>58024C, 58025C, 58026C, 58027C,<br>58029C) for more than 3 months                                                      | N186 plus hemodialysis treatment<br>procedure code (58001C, 58019C,<br>58020C, 58021C, 58022C, 58023C,<br>58024C, 58025C, 58026C, 58027C,<br>58029C) for more than 3 months                     |
| Peritoneal dialysis | 585 plus hemodialysis treatment<br>procedure code (58002C, 58009B,<br>58010A, 58010B, 58011A,<br>58011AB, 58017B, 58017C,<br>58011B, 58011C, 58012A, 58012B,<br>58028C) for more than 3 months                                  | N186 plus hemodialysis treatment<br>procedure code (58002C, 58009B,<br>58010A, 58010B, 58011A,<br>58011AB, 58017B, 58017C,<br>58011B, 58011C, 58012A, 58012B,<br>58028C) for more than 3 months |

**Table S3.** Definition of medications

| Medication group                              | Specific medications                                                                                                                                                                                                          | ATC code                                         |
|-----------------------------------------------|-------------------------------------------------------------------------------------------------------------------------------------------------------------------------------------------------------------------------------|--------------------------------------------------|
| Osteoporosis drug                             | Denosumab                                                                                                                                                                                                                     | M05BX04                                          |
| Osteoporosis drug                             | Etidronic acid, clodronic acid, pamidronic acid, alendronic acid, tiludronic acid, ibandronic acid, risedronic acid, zoledronic acid, strontium ranelate, raloxifene, teriparatide                                            | M05BA, M05BB, M05BX03, M05BX53, G03XC01, H05AA02 |
| Diabetic drugs                                | Insulin, Biguanides, Sulfonylureas, Alpha-glucosidase inhibitors, Thiazolidinediones, Dipeptidyl peptidase 4 (DPP-4) inhibitors, Glucagon-like peptide-1 (GLP-1) analogues, Sodium-glucose cotransporter-2 (SGLT-2) inhibitor | A10A, A10B                                       |
| Antihypertensive                              | Angiotensin-Converting Enzyme inhibitors (ACEI), Angiotensin Receptor Blockers (ARB), Renin-inhibitors, Beta-blockers, Calcium channel blockers, Alpha-blocker                                                                | C02CA, C07, C08, C09A, C09B, C09C, C09D, C09XA   |
| Lipid-lowering drugs                          | HMG CoA reductase inhibitors, Fibrate                                                                                                                                                                                         | C10AA, C10AB                                     |
| Anticoagulants                                | Warfarin, Direct factor Xa inhibitors, Direct thrombin inhibitors                                                                                                                                                             | B01AA03, B01AE, B01AF                            |
| Diuretics                                     | Thiazide, Loop diuretics, Potassium-sparing agents, Vasopressin antagonists                                                                                                                                                   | C03A, C03C, C03D, C03XA                          |
| Proton pump inhibitors                        | Proton pump inhibitors                                                                                                                                                                                                        | A02BC                                            |
| Nonsteroidal anti-inflammatory drugs (NSAIDs) | Traditional Nonsteroidal anti-inflammatory drugs (NSAIDs), Cox-2 inhibitor                                                                                                                                                    | M01AA, M01AB, M01AC, M01AE, M01AG, M01AH         |
| Corticosteroids                               | Mineralocorticoids, Glucocorticoids                                                                                                                                                                                           | H02AA, H02AB                                     |

**Table S4.** Definition of the cause of death

| Cause of death               | ICD-10 code                                                                                                                                                                                                                                                                                                                    |
|------------------------------|--------------------------------------------------------------------------------------------------------------------------------------------------------------------------------------------------------------------------------------------------------------------------------------------------------------------------------|
| Cardiovascular mortality     | I01-I02.0, I05-I09, I20-I25, I27, I30-I52, I60-I69, I70, I71                                                                                                                                                                                                                                                                   |
| Non-cardiovascular mortality | C00-C97, D00-D48, D50-D64, E10-E14, F01-F03, G00, G03, G12, G20-G21, G30, I10-I15, J10-J11, J12-J18, J20-J21, J40-J47, J60-J65, J66, J68-J69, K25-K28, K40-K46, K56, K70, K73-K74, K80-K82, L00-L99, M00-M99, N00-N07, N17-N19, N25-N27, O00-O99, P00-P96, Q00-Q99, R54, R95, V01-X59, Y85-Y86, X60-X84, Y87.0, X85-Y09, Y87.1 |

**Table S5.** Specific comorbidities in Deyo's Charlson comorbidity index between high and low adherence denosumab users in the overall cohort

|                                       | Low adherence<br>(n = 409) | High adherence<br>(n = 713) | <i>p</i> -value |
|---------------------------------------|----------------------------|-----------------------------|-----------------|
| Myocardial infarction                 | 15 (3.7%)                  | 26 (3.6%)                   | 1.00            |
| Congestive heart failure              | 38 (9.3%)                  | 54 (7.6%)                   | 0.37            |
| Peripheral vascular disease           | 9 (2.2%)                   | 29 (4.1%)                   | 0.14            |
| Cerebrovascular disease               | 69 (16.9%)                 | 134 (18.8%)                 | 0.47            |
| Dementia                              | 46 (11.2%)                 | 64 (9.0%)                   | 0.26            |
| Chronic pulmonary disease             | 51 (12.5%)                 | 110 (15.4%)                 | 0.20            |
| Rheumatic disease                     | 14 (3.4%)                  | 29 (4.1%)                   | 0.70            |
| Peptic ulcer disease                  | 86 (21.0%)                 | 161 (22.6%)                 | 0.60            |
| Mild liver disease                    | 33 (8.1%)                  | 66 (9.3%)                   | 0.57            |
| Moderate or severe liver disease      | 1 (0.2%)                   | 4 (0.6%)                    | 0.66            |
| Diabetes without chronic complication | 149 (36.4%)                | 222 (31.1%)                 | 0.08            |
| Diabetes with complication            | 60 (14.7%)                 | 88 (12.3%)                  | 0.31            |
| Renal disease                         | 66 (16.1%)                 | 96 (13.5%)                  | 0.26            |
| Hemiplegia or paraplegia              | 6 (1.5%)                   | 10 (1.4%)                   | 1.00            |
| Any malignancy                        | 55 (13.4%)                 | 91 (12.8%)                  | 0.81            |
| Metastatic solid tumor                | 5 (1.2%)                   | 9 (1.3%)                    | 1.00            |
| AIDS/HIV                              | 0                          | 0                           | 1.00            |

Abbreviation: AIDS/HIV, acquired immunodeficiency syndrome/human immunodeficiency virus

**Table S6.** The crude and adjusted hazard ratio of cardiovascular mortality and non-cardiovascular mortality between high adherence and adherence denosumab treatment in the overall cohort and chronic kidney disease subcohort

|                              | Mortality   |            | Hazard ratio (95% Confidence Interval) |                   |
|------------------------------|-------------|------------|----------------------------------------|-------------------|
|                              | No          | Yes        | Crude                                  | Adjusted*         |
|                              | N(%)        | N(%)       |                                        |                   |
| Cardiovascular mortality     |             |            |                                        |                   |
| Overall cohort               |             |            |                                        |                   |
| Low adherence (n = 409)      | 392 (95.8%) | 17 (4.2%)  | Reference                              | Reference         |
| High adherence (n = 713)     | 695 (97.5%) | 18 (2.5%)  | 0.58 (0.30, 1.12)                      | 0.58 (0.30, 1.12) |
| CKD subcohort                |             |            |                                        |                   |
| Low adherence (n = 201)      | 186 (92.5%) | 15 (7.5%)  | Reference                              | Reference         |
| High adherence (n = 299)     | 287 (96.0%) | 12 (4.0%)  | 0.49 (0.23, 1.04)                      | 0.46 (0.21, 0.98) |
| Non-Cardiovascular mortality |             |            |                                        |                   |
| Overall cohort               |             |            |                                        |                   |
| Low adherence (n = 409)      | 342 (83.6%) | 67 (16.4%) | Reference                              | Reference         |
| High adherence (n = 713)     | 633 (88.8%) | 80 (11.2%) | 0.65 (0.47, 0.90)                      | 0.66 (0.47, 0.91) |
| CKD subcohort                |             |            |                                        |                   |
| Low adherence (n = 201)      | 155 (77.1%) | 46 (22.9%) | Reference                              | Reference         |
| High adherence (n = 299)     | 247 (82.6%) | 52 (17.4%) | 0.69 (0.46, 1.03)                      | 0.66 (0.44, 0.98) |

\*Adjusted for age, gender, and Charlson comorbidity index score

**Table S7.** A comparison of ionized calcium level before and after denosumab treatment in the overall cohort and chronic kidney disease cohort

|                | Before index date | After index date  | <i>p</i> for paired t-test |
|----------------|-------------------|-------------------|----------------------------|
| Overall cohort |                   |                   |                            |
| Low adherence  | 4.67 ± 0.37 mg/dl | 4.38 ± 0.40 mg/dl | 0.08                       |
| High adherence | 4.68 ± 0.29 mg/dl | 4.59 ± 0.28 mg/dl | 0.10                       |
| CKD subcohort  |                   |                   |                            |
| Low adherence  | 4.66 ± 0.38 mg/dl | 4.33 ± 0.39 mg/dl | 0.17                       |
| High adherence | 4.66 ± 0.32 mg/dl | 4.60 ± 0.33 mg/dl | 0.29                       |

Ionized calcium level: three months average before the first denosumab treatment (before the index date) and three months average after the first denosumab treatment (after the index date)

Abbreviation: CKD, chronic kidney disease



**Figure S1.** Kaplan Meier curve for cardiovascular mortality, cancer mortality, infectious mortality, and other mortality between high adherence and low adherence of denosumab treatment in (A) overall cohort and (B) chronic kidney disease subcohort

**(A) Overall cohort**

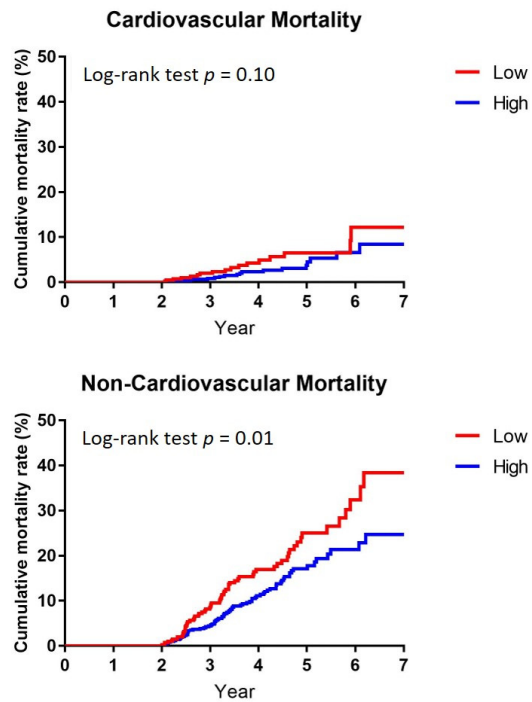

**(B) Chronic kidney disease subcohort**

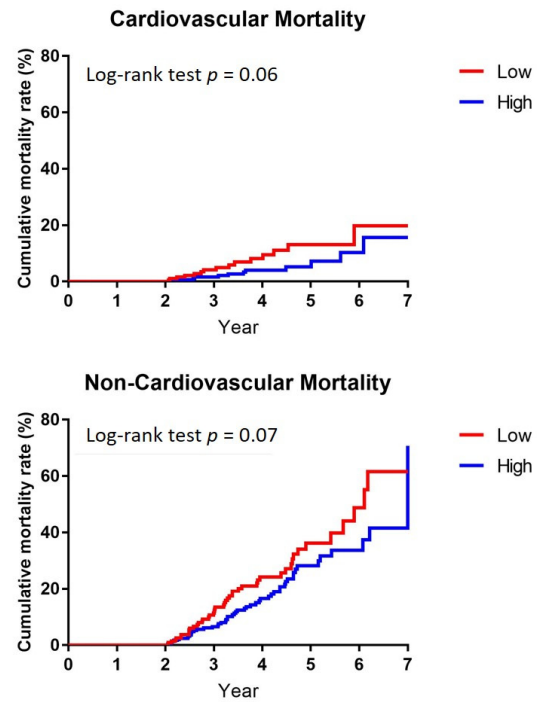

Supplement: s1 [file s1]
